# Supplementary material
Source: publisher figshare collection journal article supplement (https://gsajournals.figshare.com/articles/dataset/_/14479185)

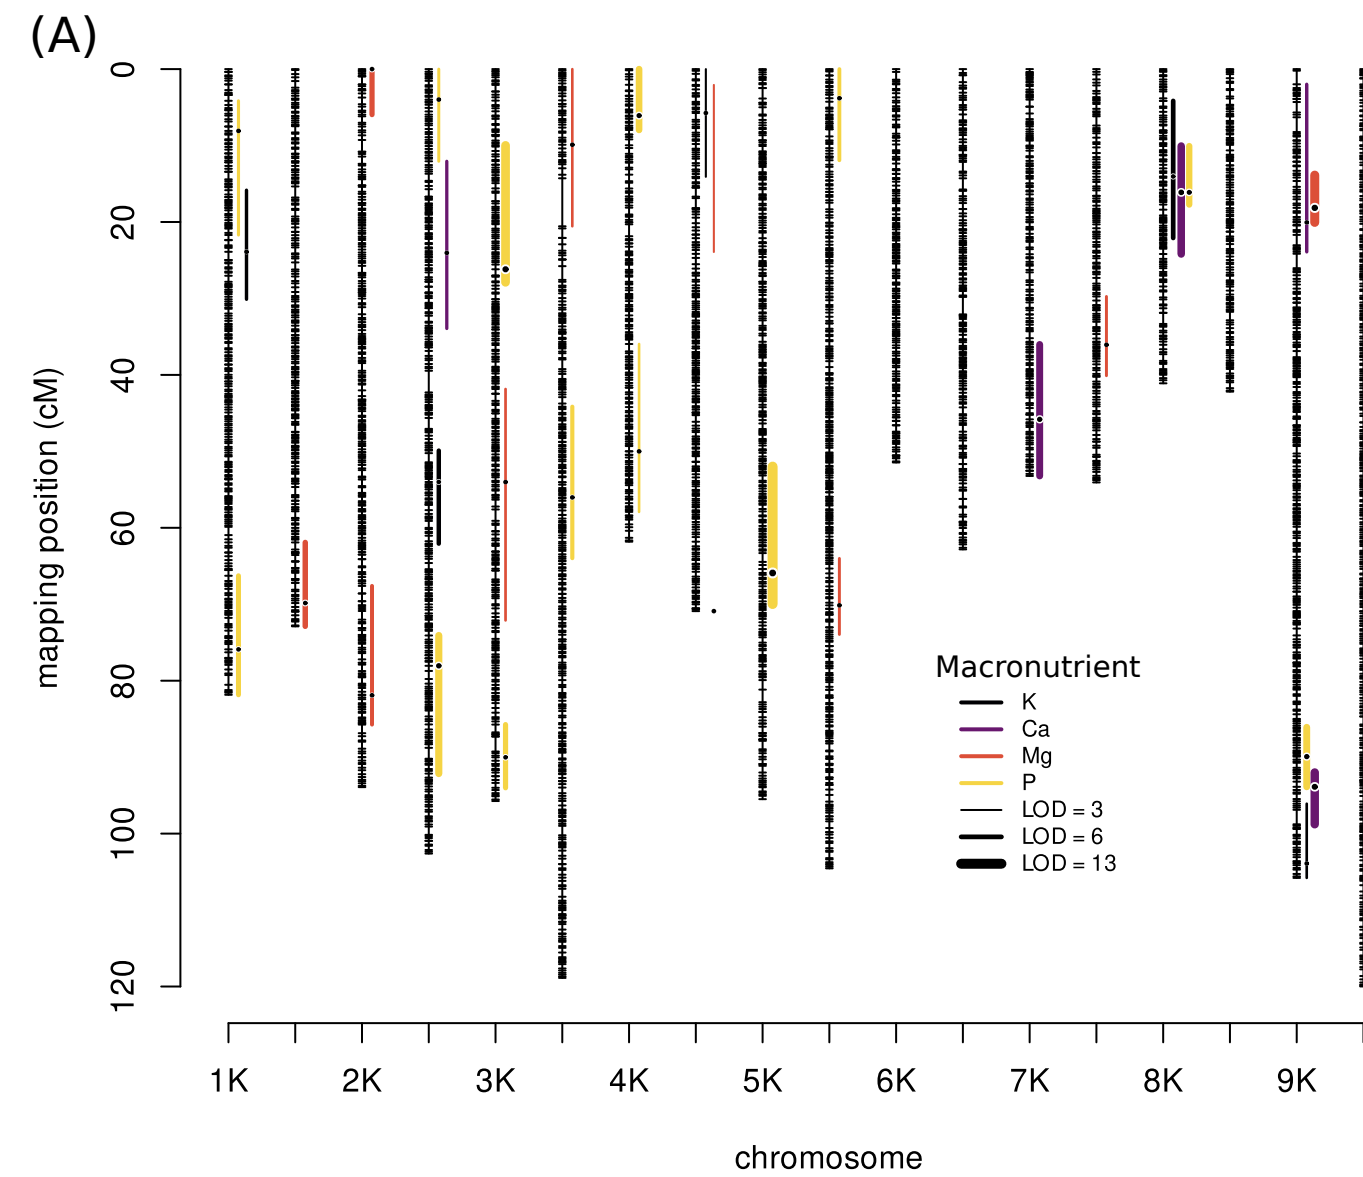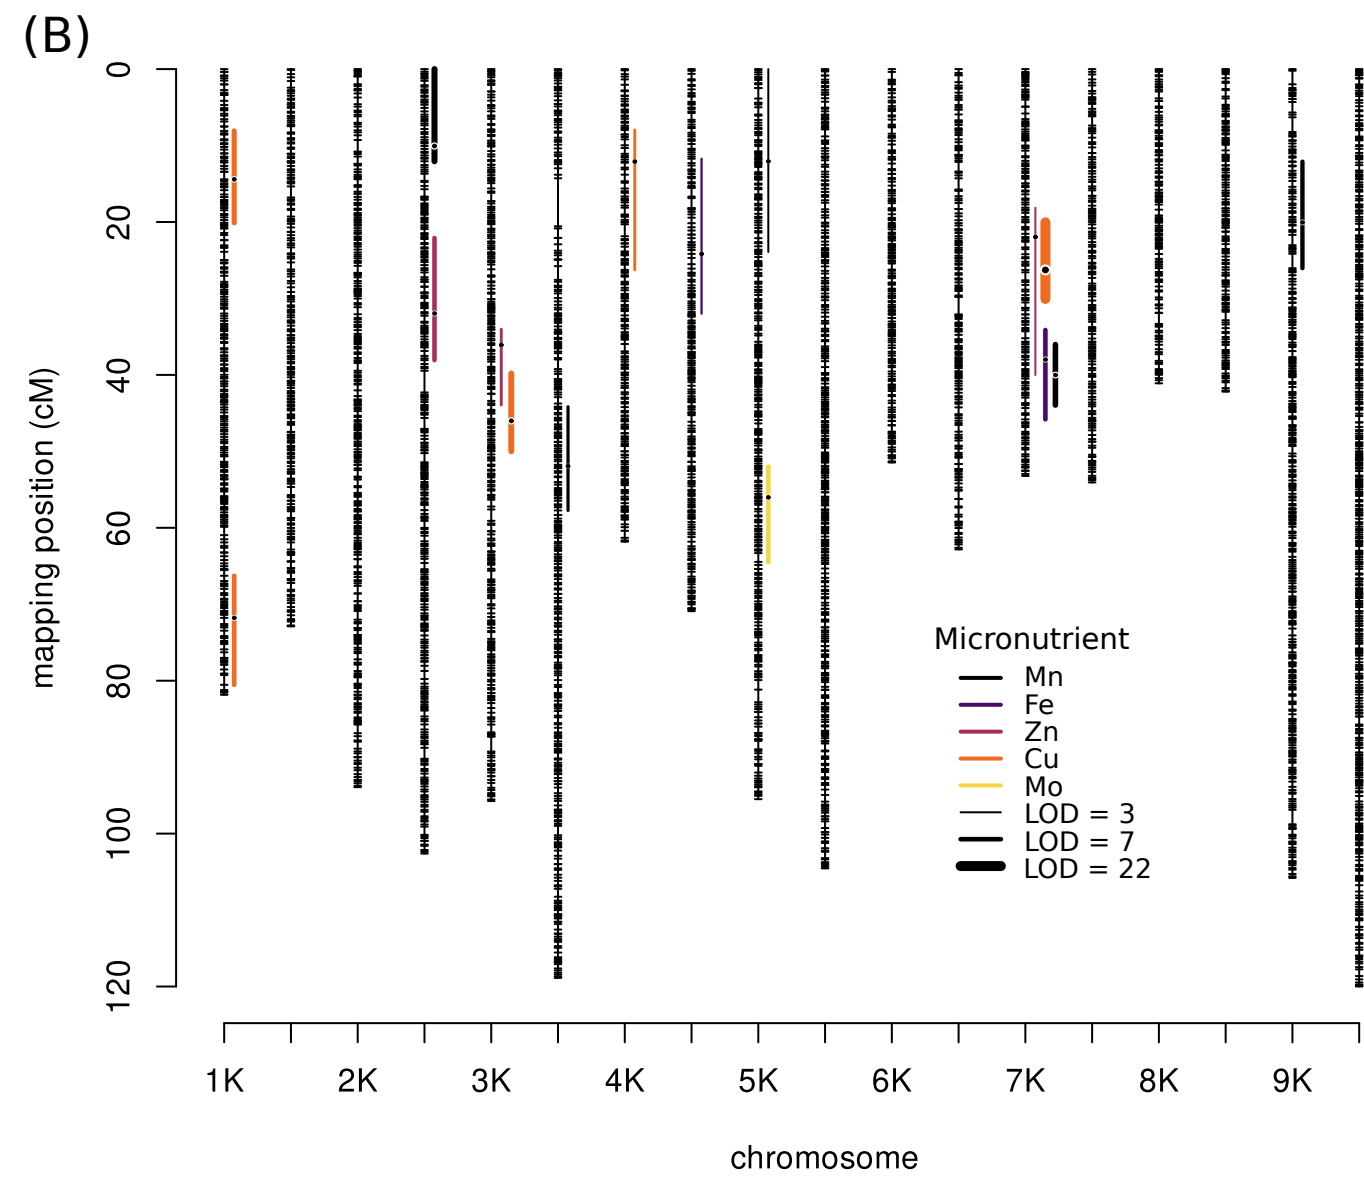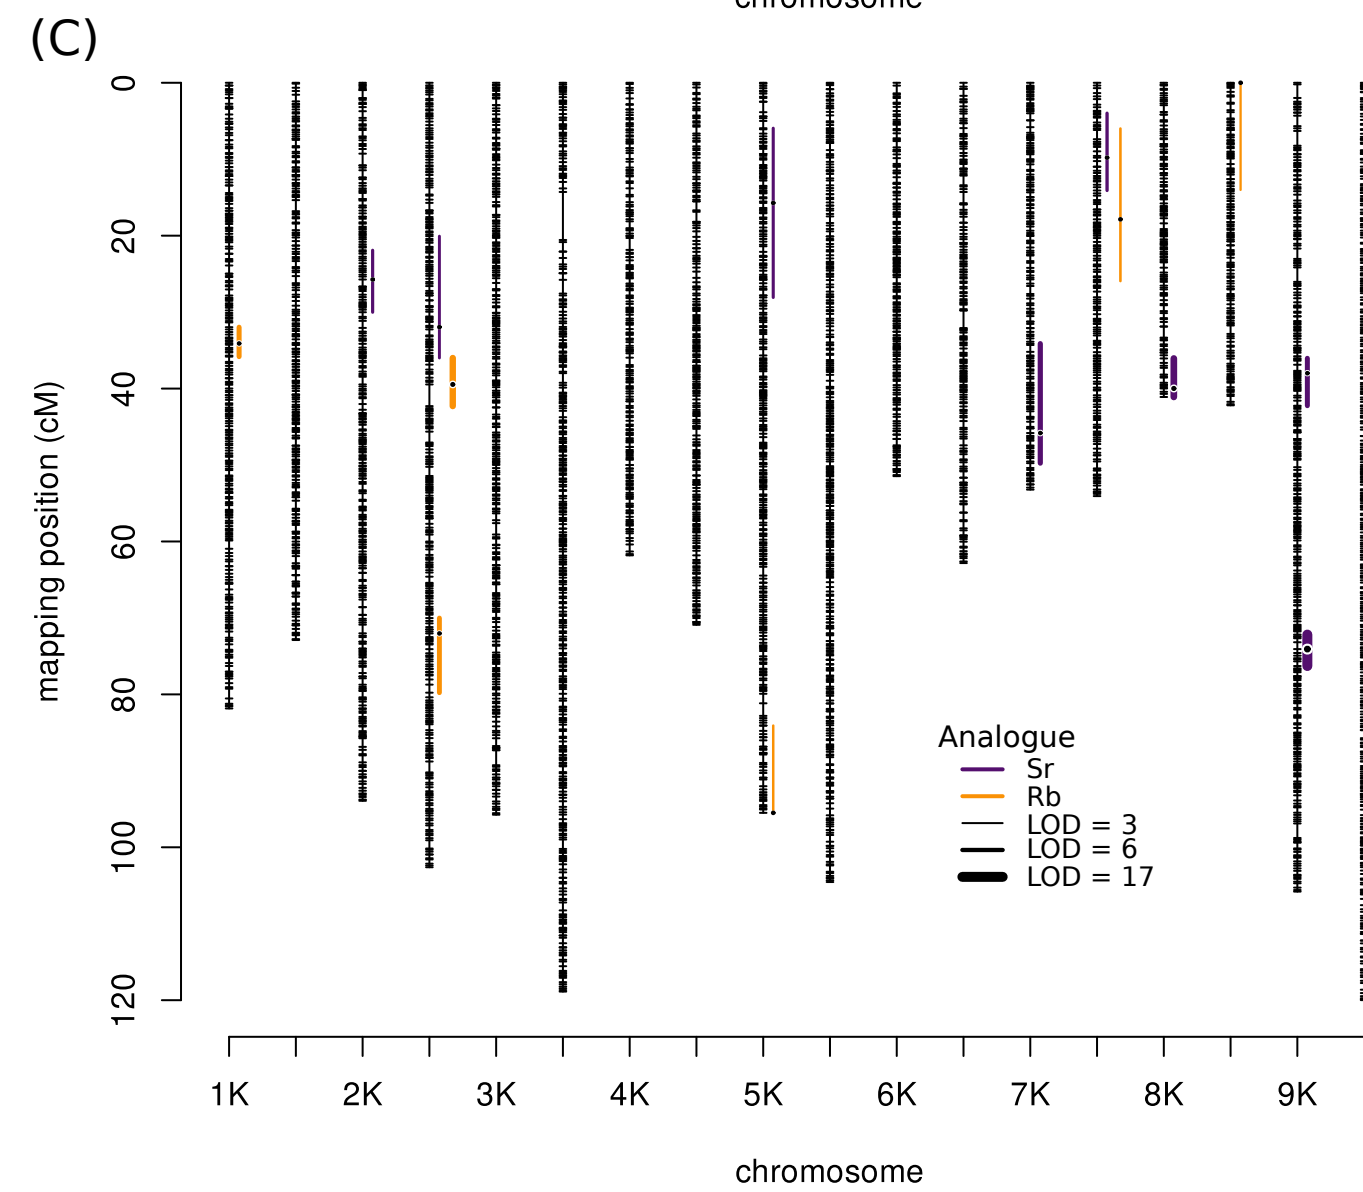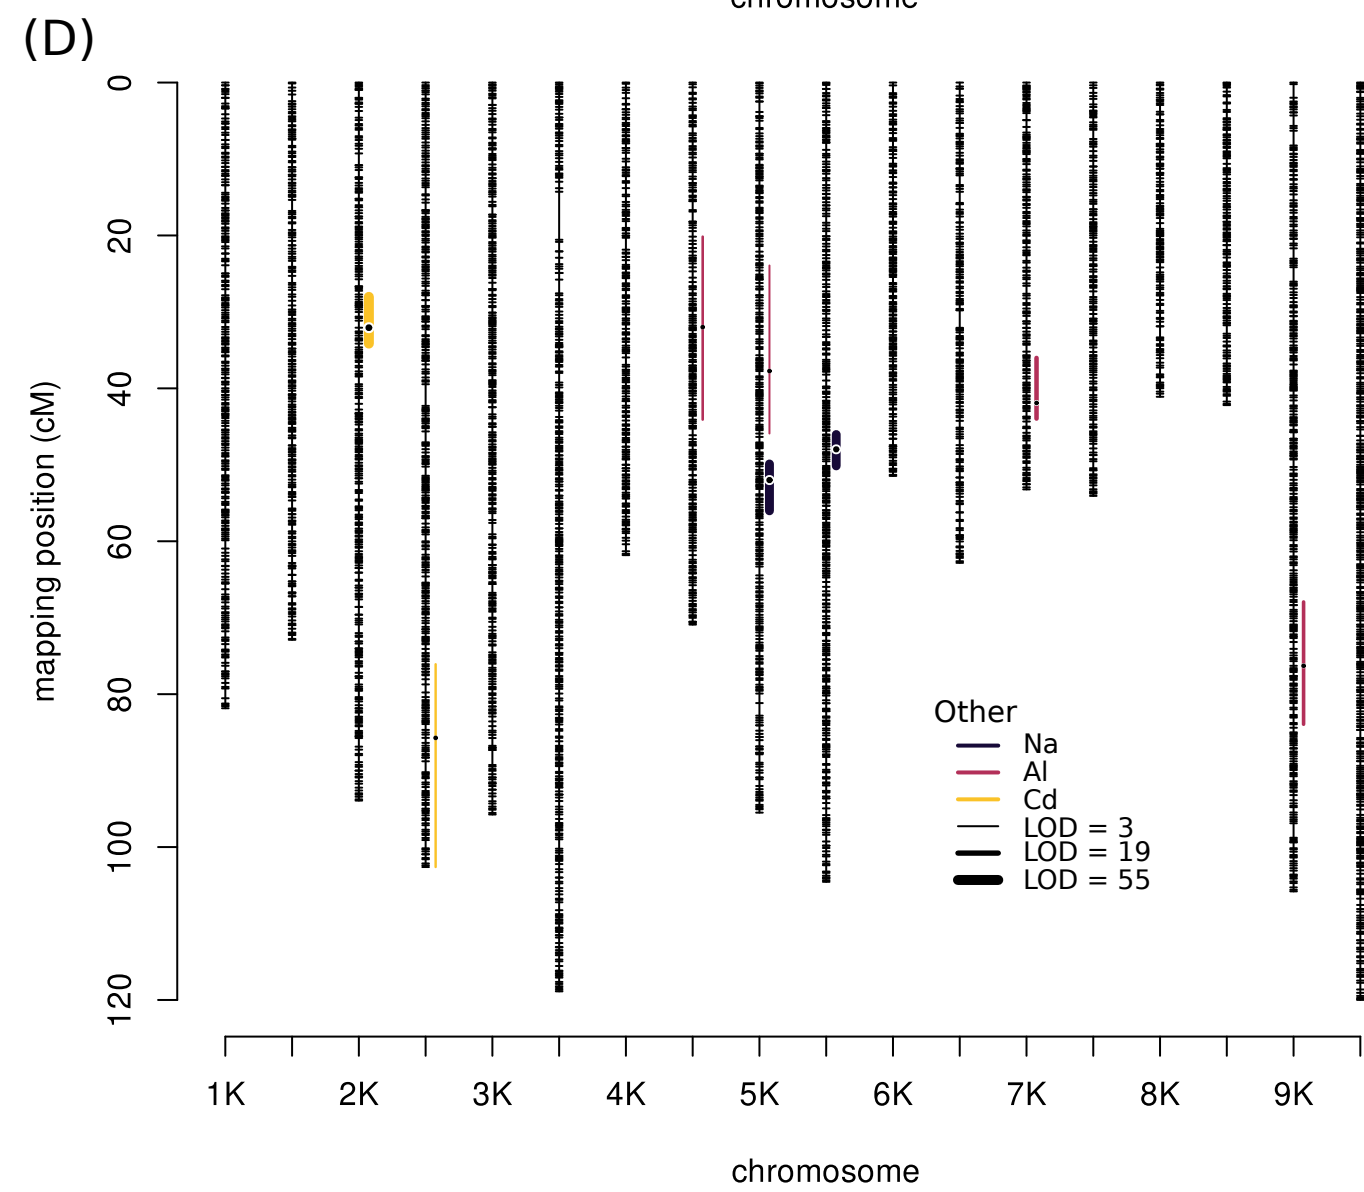

Supplement: Supplementary file 1 [file 1]

K

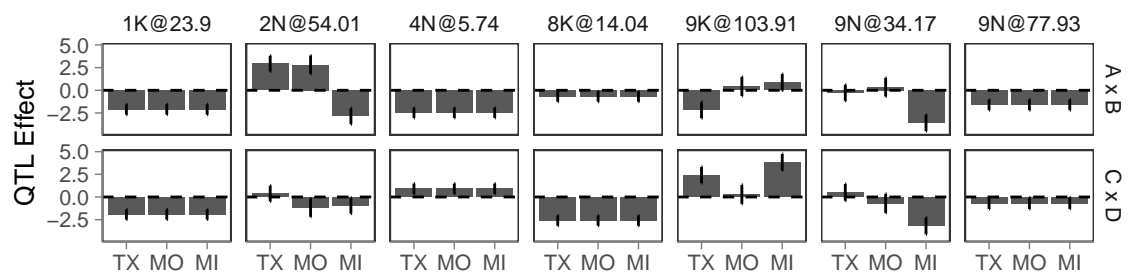

Mg

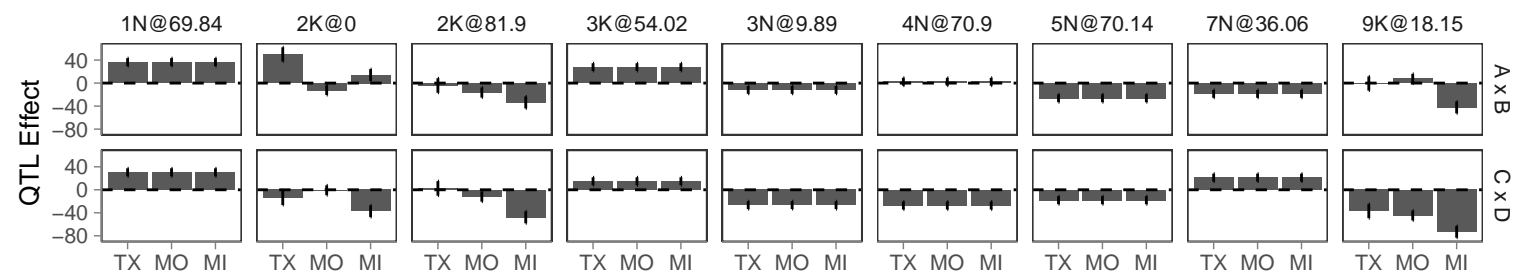

Ca

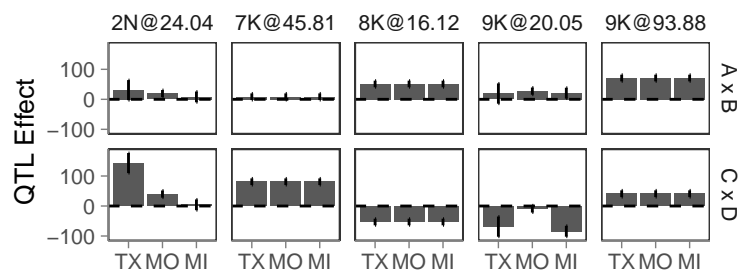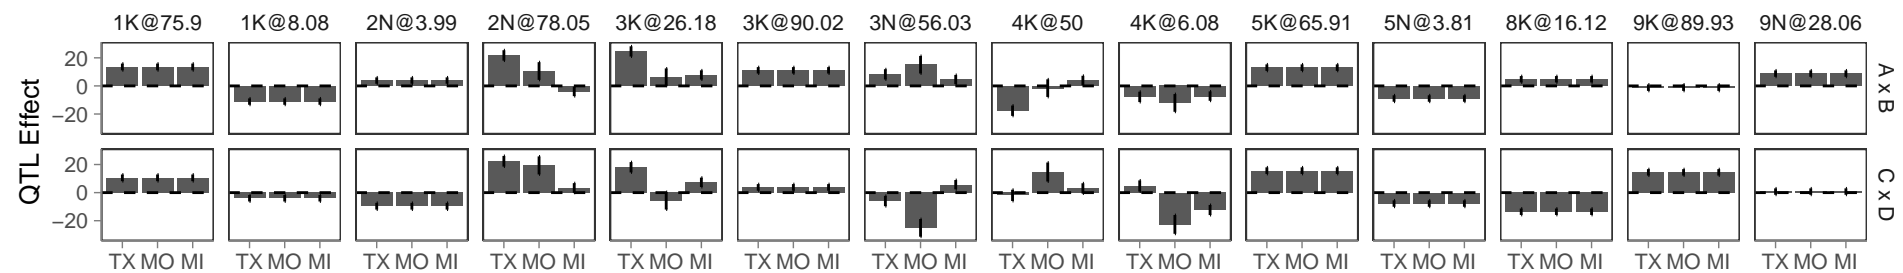

Mn

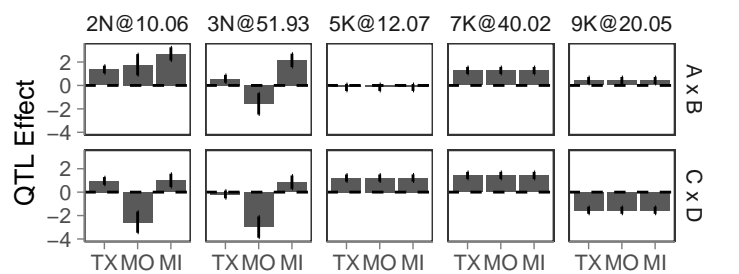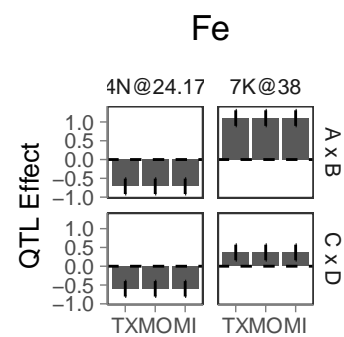

Zn

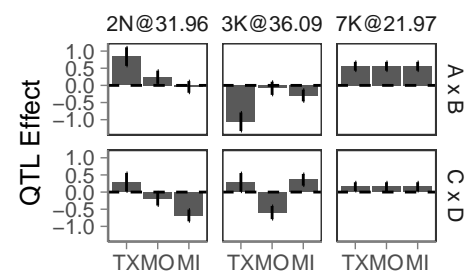

Cu

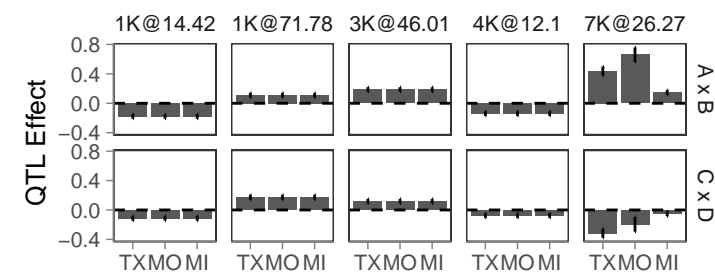

Mo

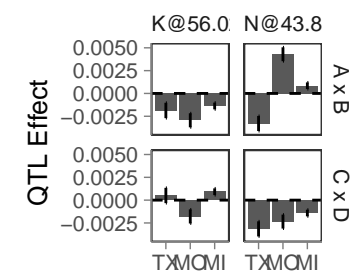

Sr

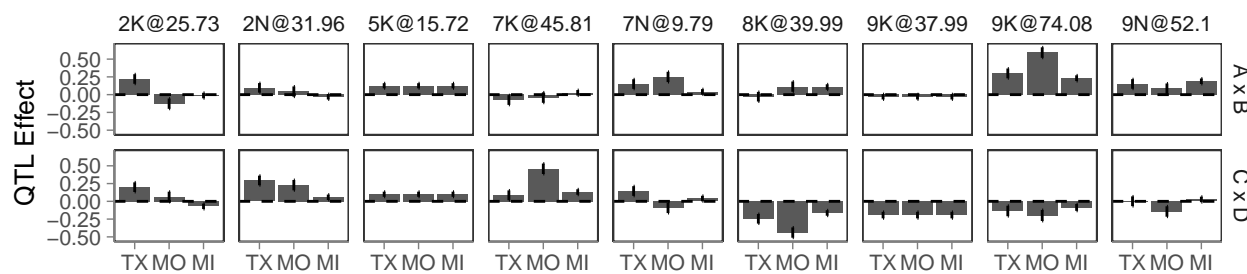

Rb

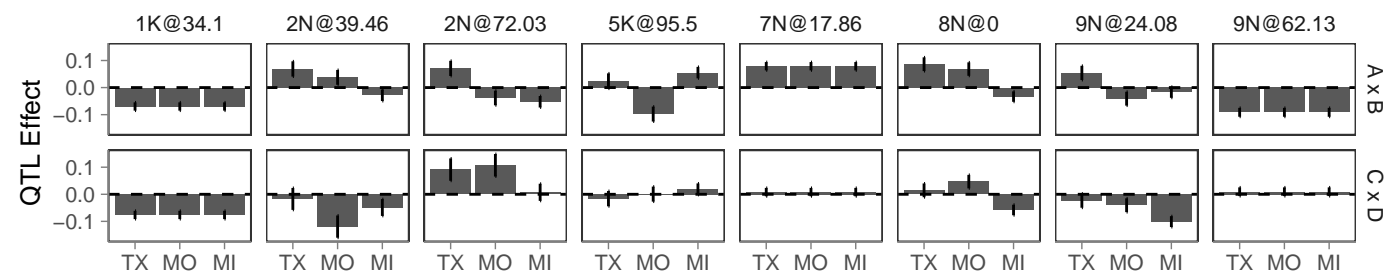

Na

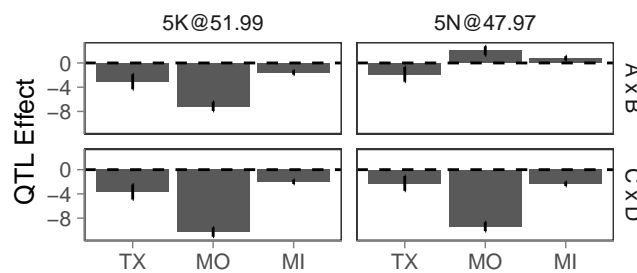

Al

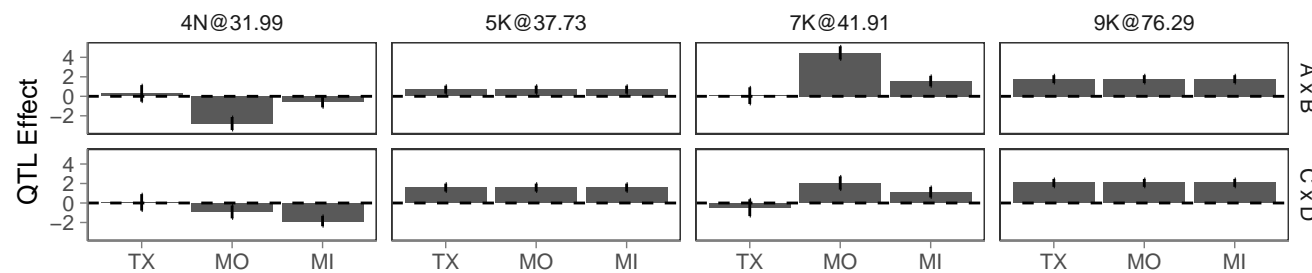

Cd

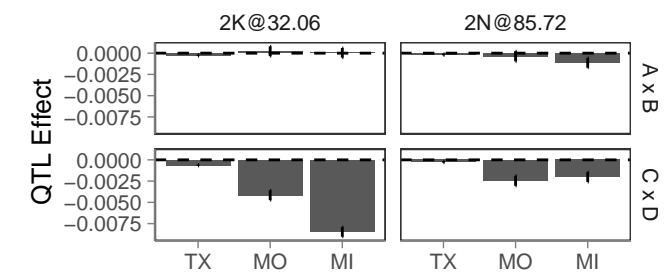

Supplement: Supplementary file 2 [file 1]
